# Supplementary material
Source: PubMed Central journal article supplement (PMC6779209)
Supplement: tpmd190081.SD1.pdf [file tpmd190081.SD1.pdf]

**Supplemental Table 1**

| Gene              | Chromosome | Genomic Coordinates            | Target Codons            | Primer                                                                                                                                           | Final Concentrations                                                                                                                                                                              | Thermocycler                                                                                                                                 | Reference |
|-------------------|------------|--------------------------------|--------------------------|--------------------------------------------------------------------------------------------------------------------------------------------------|---------------------------------------------------------------------------------------------------------------------------------------------------------------------------------------------------|----------------------------------------------------------------------------------------------------------------------------------------------|-----------|
| <i>crt</i>        | 7          | Start: 403484<br>End: 403690   | 72S<br>74I<br>75E<br>76T | F: AACAGATGGCTCACGTTTAGG<br><br>R: TGTGAGTTTCGGATGTTACAAAA                                                                                       | 1. 10X AccuPrime™ PCR Buffer II: 1x<br>2. AccuPrime™ HiFi Taq Polymerase: 0.2 U<br>3. Forward Primer: 800 nM<br>4. Reverse Primer: 800 nM<br>5. BSA: 0.05 mg/mL                                   | 1. 95°C for 2 min<br>2. 35 cycles of 95°C for 30 secs, 50°C for 30 secs, and 68°C for 1 min<br>3. 68°C for 10 min                            | 1         |
| <i>kelch</i><br>* | 13         | Start: 1724994<br>End: 1725490 | 539T<br>580Y             | F: AGGCTTTATTTGAAACTGAGGTGT<br><br>R: TCTGGTACACCATTAGAAATTGCC                                                                                   | 1. 10X AccuPrime™ PCR Buffer II: 1x<br>2. AccuPrime™ HiFi Taq Polymerase: 0.2 U<br>3. Forward Primer: 200 nM<br>4. Reverse Primer: 200 nM<br>5. BSA: 0.05 mg/mL                                   | 1. 95°C for 2 min<br>2. 35 cycles of 95°C for 30 secs, 58°C for 30 secs, and 68°C for 1 min<br>3. 68°C for 10 min                            | *         |
| <i>mdr1</i>       | 5          | Start: 957959<br>End: 958493   | 86Y<br>184F              | Outer F: AGGTTGAAAAAGAGTTGAAC<br><br>Outer R: ATGACACCACAAACATAAAT<br><br>Inner F: ACAAAAAGAGTACCGCTGAAT<br><br>Inner R: AAACGCAAGTAATACATAAAGTC | <i>Outer &amp; Nested Step</i><br>1. 10X AccuPrime™ PCR Buffer II: 1x<br>2. AccuPrime™ HiFi Taq Polymerase: 0.2 U<br>3. Forward Primer: 200 nM<br>4. Reverse Primer: 200 nM<br>5. BSA: 0.05 mg/mL | <i>Outer/Nested</i><br>1. 94°C for 3 min<br>2. 30 cycles of 94°C for 30 secs, 55°C/60°C for 30 secs, and 68°C for 1 min<br>3. 68°C for 5 min | 2**       |
| <i>mdr1</i>       | 5          | Start: 961527<br>End: 961847   | 1246Y                    | F: TTCAAACCAATCTGGATCTGC<br><br>R: TTCTCTGTTTTTGTCACCTGA                                                                                         | 1. 10X AccuPrime™ PCR Buffer II: 1x<br>2. AccuPrime™ HiFi Taq Polymerase: 0.2 U<br>3. Forward Primer: 400 nM<br>4. Reverse Primer: 400 nM<br>5. BSA: 0.05 mg/mL                                   | 1. 95°C for 15 min<br>2. 40 cycles of 94°C for 30 secs, 55.5°C for 30 secs, and 68°C for 1 min<br>3. 68°C for 10 min                         | 3***      |

**Supplemental Table 1.** Summary of the genomic targets, primers, recipes, and thermocycler conditions for the amplicons generated in this study. The genomic coordinates are 1-based and are base off of the Pf3D7 version 3 reference genome. The forward (F) and reverse primer (R ) are listed as 5' to 3'. Primer sequences for *crt* were adapted from Juliano *et al.* 2007 and the thermocycler conditions were adapted for the AccuPrime™ HiFi Taq Polymerase. Similarly, the primer sequences for the *mdr1* amplicon targeting loci 86 and 184 were taken from Humphreys *et al.* 2007 and the thermocycler conditions were adapted for the AccuPrime™ HiFi Taq Polymerase. Finally, the primers for the *mdr1* amplicon targeting loci 1246 were adapted from Kwansa-Bentum *et al.* 2011. Each PCR reaction used 5 µL of template DNA and had a total volume of 20 µL.

\*The primers for the *kelch* amplicon were designed using the *kelch* reference sequence from PlasmoDB (accessed May 2, 2017) and the Primer3/BLAST engine from NCBI. The forward and reverse primers were requested to fall between the local coordinates of 1415-1515 and 1838-1938, respectively. Default settings were used with the exception of excluding *Homo sapiens* from Refseq mRNA under the heading Primer Pair Specificity Checking Parameters.

\*\* Thermocycler conditions were adapted from original protocol for the AccuPrime™ HiFi Taq Polymerase.

\*\*\* Primers were adapted for this study and thermocycler conditions were adapted for AccuPrime™ HiFi Taq Polymerase.

**Supplemental Table 2**

| Pool   | Gene Target | Frequency | Haplotype | Haplotype Count | SNP Amplicon Position | SNP | SNP Gene Position | Codon | Referent AA | Alternate AA | Mutant Type |
|--------|-------------|-----------|-----------|-----------------|-----------------------|-----|-------------------|-------|-------------|--------------|-------------|
| Pool 1 | crt         | 0.52      | PfCRT.0   | 82              |                       |     |                   |       |             |              |             |
| Pool 1 | crt         | 0.48      | PfCRT.1   | 75              | 115                   | T   | 222               | 74    | M           | I            | N           |
| Pool 1 | crt         | 0.48      | PfCRT.1   | 75              | 116                   | G   | 223               | 75    | N           | E            | N           |
| Pool 1 | crt         | 0.48      | PfCRT.1   | 75              | 118                   | A   | 225               | 75    | N           | E            | N           |
| Pool 1 | crt         | 0.48      | PfCRT.1   | 75              | 120                   | C   | 227               | 76    | K           | T            | N           |
| Pool 1 | k13         | 1.00      | K13.0     | 91              |                       |     |                   |       |             |              |             |
| Pool 1 | mdrE        | 1.00      | MDR1E.0   | 445             |                       |     |                   |       |             |              |             |
| Pool 1 | mdrL        | 1.00      | MDR1L.0   | 208228          |                       |     |                   |       |             |              |             |
| Pool 2 | crt         | 0.64      | PfCRT.1   | 2502            | 115                   | T   | 222               | 74    | M           | I            | N           |
| Pool 2 | crt         | 0.64      | PfCRT.1   | 2502            | 116                   | G   | 223               | 75    | N           | E            | N           |
| Pool 2 | crt         | 0.64      | PfCRT.1   | 2502            | 118                   | A   | 225               | 75    | N           | E            | N           |
| Pool 2 | crt         | 0.64      | PfCRT.1   | 2502            | 120                   | C   | 227               | 76    | K           | T            | N           |
| Pool 2 | crt         | 0.36      | PfCRT.0   | 1416            |                       |     |                   |       |             |              |             |
| Pool 2 | k13         | 1.00      | K13.0     | 19666           |                       |     |                   |       |             |              |             |
| Pool 2 | mdrE        | 0.54      | MDR1E.0   | 349             |                       |     |                   |       |             |              |             |
| Pool 2 | mdrE        | 0.46      | MDR1E.1   | 295             | 460                   | T   | 551               | 184   | Y           | F            | N           |
| Pool 2 | mdrL        | 1.00      | MDR1L.0   | 14881           |                       |     |                   |       |             |              |             |
| Pool 3 | crt         | 0.56      | PfCRT.0   | 93760           |                       |     |                   |       |             |              |             |
| Pool 3 | crt         | 0.44      | PfCRT.1   | 74736           | 115                   | T   | 222               | 74    | M           | I            | N           |
| Pool 3 | crt         | 0.44      | PfCRT.1   | 74736           | 116                   | G   | 223               | 75    | N           | E            | N           |
| Pool 3 | crt         | 0.44      | PfCRT.1   | 74736           | 118                   | A   | 225               | 75    | N           | E            | N           |

|        |      |      |         |        |     |   |     |     |   |   |   |
|--------|------|------|---------|--------|-----|---|-----|-----|---|---|---|
| Pool 3 | crt  | 0.44 | PfCRT.1 | 74736  | 120 | C | 227 | 76  | K | T | N |
| Pool 3 | k13  | 1.00 | K13.0   | 302947 |     |   |     |     |   |   |   |
| Pool 3 | mdrE | 0.83 | MDR1E.1 | 25516  | 460 | T | 551 | 184 | Y | F | N |
| Pool 3 | mdrE | 0.11 | MDR1E.0 | 3331   |     |   |     |     |   |   |   |
| Pool 3 | mdrE | 0.06 | MDR1E.3 | 1974   | 140 | A | 231 | 77  | V | V | S |
| Pool 3 | mdrL | 1.00 | MDR1L.0 | 187805 |     |   |     |     |   |   |   |
| Pool 4 | crt  | 0.83 | PfCRT.0 | 145205 |     |   |     |     |   |   |   |
| Pool 4 | crt  | 0.17 | PfCRT.1 | 29439  | 115 | T | 222 | 74  | M | I | N |
| Pool 4 | crt  | 0.17 | PfCRT.1 | 29439  | 116 | G | 223 | 75  | N | E | N |
| Pool 4 | crt  | 0.17 | PfCRT.1 | 29439  | 118 | A | 225 | 75  | N | E | N |
| Pool 4 | crt  | 0.17 | PfCRT.1 | 29439  | 120 | C | 227 | 76  | K | T | N |
| Pool 4 | k13  | 1.00 | K13.0   | 213592 |     |   |     |     |   |   |   |
| Pool 4 | mdrE | 0.62 | MDR1E.0 | 15278  |     |   |     |     |   |   |   |
| Pool 4 | mdrE | 0.38 | MDR1E.1 | 9384   | 460 | T | 551 | 184 | Y | F | N |
| Pool 4 | mdrL | 1.00 | MDR1L.0 | 88103  |     |   |     |     |   |   |   |
| Pool 5 | crt  | 0.54 | PfCRT.0 | 159398 |     |   |     |     |   |   |   |
| Pool 5 | crt  | 0.46 | PfCRT.1 | 133898 | 115 | T | 222 | 74  | M | I | N |
| Pool 5 | crt  | 0.46 | PfCRT.1 | 133898 | 116 | G | 223 | 75  | N | E | N |
| Pool 5 | crt  | 0.46 | PfCRT.1 | 133898 | 118 | A | 225 | 75  | N | E | N |
| Pool 5 | crt  | 0.46 | PfCRT.1 | 133898 | 120 | C | 227 | 76  | K | T | N |
| Pool 5 | k13  | 1.00 | K13.0   | 236833 |     |   |     |     |   |   |   |
| Pool 5 | mdrE | 0.82 | MDR1E.0 | 55800  |     |   |     |     |   |   |   |
| Pool 5 | mdrE | 0.18 | MDR1E.1 | 12317  | 460 | T | 551 | 184 | Y | F | N |
| Pool 5 | mdrL | 1.00 | MDR1L.0 | 284040 |     |   |     |     |   |   |   |
| Pool 6 | crt  | 0.91 | PfCRT.1 | 264462 | 115 | T | 222 | 74  | M | I | N |
| Pool 6 | crt  | 0.91 | PfCRT.1 | 264462 | 116 | G | 223 | 75  | N | E | N |
| Pool 6 | crt  | 0.91 | PfCRT.1 | 264462 | 118 | A | 225 | 75  | N | E | N |
| Pool 6 | crt  | 0.91 | PfCRT.1 | 264462 | 120 | C | 227 | 76  | K | T | N |
| Pool 6 | crt  | 0.09 | PfCRT.0 | 25200  |     |   |     |     |   |   |   |

|        |      |      |         |        |     |   |     |     |   |   |   |
|--------|------|------|---------|--------|-----|---|-----|-----|---|---|---|
| Pool 6 | k13  | 1.00 | K13.0   | 191824 |     |   |     |     |   |   |   |
| Pool 6 | mdrE | 0.58 | MDR1E.1 | 20539  | 460 | T | 551 | 184 | Y | F | N |
| Pool 6 | mdrE | 0.42 | MDR1E.0 | 14708  |     |   |     |     |   |   |   |
| Pool 6 | mdrL | 1.00 | MDR1L.0 | 167846 |     |   |     |     |   |   |   |
| Pool 7 | crt  | 0.60 | PfCRT.0 | 312661 |     |   |     |     |   |   |   |
| Pool 7 | crt  | 0.40 | PfCRT.1 | 207787 | 115 | T | 222 | 74  | M | I | N |
| Pool 7 | crt  | 0.40 | PfCRT.1 | 207787 | 116 | G | 223 | 75  | N | E | N |
| Pool 7 | crt  | 0.40 | PfCRT.1 | 207787 | 118 | A | 225 | 75  | N | E | N |
| Pool 7 | crt  | 0.40 | PfCRT.1 | 207787 | 120 | C | 227 | 76  | K | T | N |
| Pool 7 | k13  | 1.00 | K13.0   | 167241 |     |   |     |     |   |   |   |
| Pool 7 | mdrE | 0.52 | MDR1E.0 | 4123   |     |   |     |     |   |   |   |
| Pool 7 | mdrE | 0.48 | MDR1E.1 | 3823   | 460 | T | 551 | 184 | Y | F | N |
| Pool 7 | mdrL | 1.00 | MDR1L.0 | 65259  |     |   |     |     |   |   |   |
| Pool 8 | crt  | 0.53 | PfCRT.0 | 164053 |     |   |     |     |   |   |   |
| Pool 8 | crt  | 0.47 | PfCRT.1 | 147664 | 115 | T | 222 | 74  | M | I | N |
| Pool 8 | crt  | 0.47 | PfCRT.1 | 147664 | 116 | G | 223 | 75  | N | E | N |
| Pool 8 | crt  | 0.47 | PfCRT.1 | 147664 | 118 | A | 225 | 75  | N | E | N |
| Pool 8 | crt  | 0.47 | PfCRT.1 | 147664 | 120 | C | 227 | 76  | K | T | N |
| Pool 8 | k13  | 1.00 | K13.0   | 316202 |     |   |     |     |   |   |   |
| Pool 8 | mdrE | 0.56 | MDR1E.1 | 25951  | 460 | T | 551 | 184 | Y | F | N |
| Pool 8 | mdrE | 0.33 | MDR1E.0 | 15305  |     |   |     |     |   |   |   |
| Pool 8 | mdrE | 0.10 | MDR1E.2 | 4787   | 215 | C | 306 | 102 | G | G | S |
| Pool 8 | mdrL | 1.00 | MDR1L.0 | 216942 |     |   |     |     |   |   |   |
| Pool 9 | crt  | 0.83 | PfCRT.0 | 196471 |     |   |     |     |   |   |   |
| Pool 9 | crt  | 0.17 | PfCRT.1 | 40066  | 115 | T | 222 | 74  | M | I | N |
| Pool 9 | crt  | 0.17 | PfCRT.1 | 40066  | 116 | G | 223 | 75  | N | E | N |
| Pool 9 | crt  | 0.17 | PfCRT.1 | 40066  | 118 | A | 225 | 75  | N | E | N |
| Pool 9 | crt  | 0.17 | PfCRT.1 | 40066  | 120 | C | 227 | 76  | K | T | N |
| Pool 9 | k13  | 1.00 | K13.0   | 271346 |     |   |     |     |   |   |   |

|        |      |      |         |        |     |   |     |     |   |   |   |
|--------|------|------|---------|--------|-----|---|-----|-----|---|---|---|
| Pool 9 | mdrE | 0.79 | MDR1E.1 | 49191  | 460 | T | 551 | 184 | Y | F | N |
| Pool 9 | mdrE | 0.21 | MDR1E.0 | 13154  |     |   |     |     |   |   |   |
| Pool 9 | mdrL | 1.00 | MDR1L.0 | 247796 |     |   |     |     |   |   |   |

**Supplemental Table 2.** Summary of the haplotypes for each pool and targeted as determined by the SeekDeep (V2.6.0) program. Of note, the targets mdrE and mdrL correspond to the amplicons targeting amino acid positions 86, 184 and 1246, respectively (Supplementary Table 1). The haplotype names and the number of consensus reads for each haplotype from the SeekDeep (V2.6.0) output are given under the haplotype and haplotype count columns, respectively. The relative location of the SNP within the amplicon is provided under the column SNP Amplicon position, while the relative location of the SNP within the gene is provided under the SNP gene position column. Finally, the resulting amino acid changes are described in the last three columns with N and S corresponding to a nonsynonymous and synonymous mutation, respectively.

1. Jonathan J. Juliano, Jesse J. Kwiek, Kathryn Cappell, Victor Mwapasa, Steven R Meshnick. Minority-Variant pfcrt K76T Mutations and Chloroquine Resistance, Malawi. *Emerging Infectious Disease journal*. 2007;13(6):873. doi:[10.3201/eid1306.061182](https://doi.org/10.3201/eid1306.061182).
2. Humphreys GS, Merinopoulos I, Ahmed J, Whitty CJM, Mutabingwa TK, Sutherland CJ, Hallett RL. Amodiaquine and artemether-lumefantrine select distinct alleles of the Plasmodium falciparum mdr1 gene in Tanzanian children treated for uncomplicated malaria. *Antimicrob Agents Chemother*. 2007;51(3):991-997. doi:[10.1128/AAC.00875-06](https://doi.org/10.1128/AAC.00875-06).
3. Kwansa-Bentum B, Ayi I, Suzuki T, Otchere J, Kumagai T, Anyan WK, Osei JHN, Asahi H, Ofori MF, Akao N, Wilson MD, Boakye DA, Ohta N. Plasmodium falciparum isolates from southern Ghana exhibit polymorphisms in the SERCA-type PfATPase6 though sensitive to artesunate in vitro. *Malar J*. 2011;10:187. doi:[10.1186/1475-2875-10-187](https://doi.org/10.1186/1475-2875-10-187).
